# Supplementary material
Source: Springer Nature journal article supplement (https://www.springermedizin.de/resource/supplementary/12874_2012_880_MOESM3_ESM.pdf/9432782)

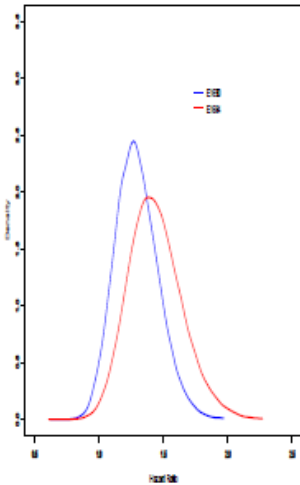

(a) Hazard Ratio (RFS)

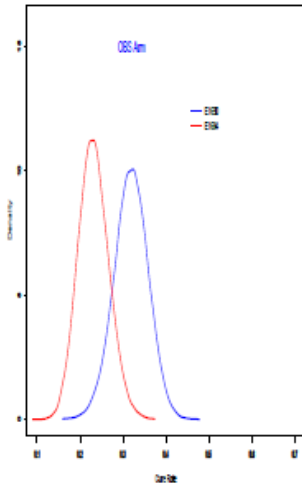

(b) Cure Rate (RFS)

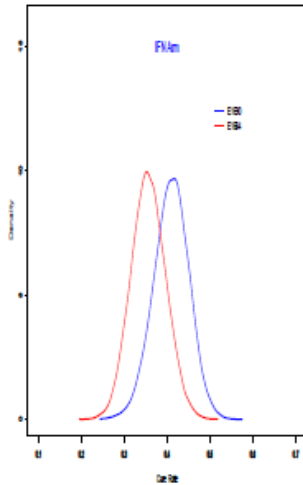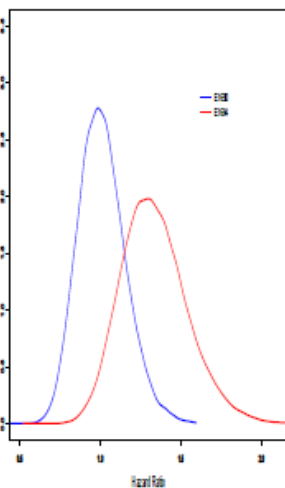

(c) Hazard Ratio (OS)

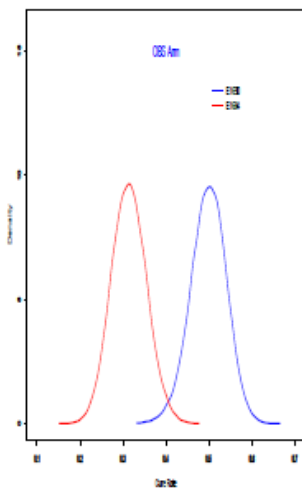

(d) Cure Rate (OS)

Supplement: MOESM3 [file 9432782]
